# Supplementary material for: Analyzing the efficacy of waste marble and glass powder for the compressive strength of self-compacting concrete using machine learning strategies
Source: publisher site journal article supplement (doi:10.1515/rams-2024-0043), 2024-01-01
Supplement: Supplementary file 1 [file rams-2024-0043_sm.xlsx]

## Sheet: Mix proportions
Article title: Analyzing the efficacy of waste marble and glass powder for the compressive strength of self-compacting concrete using machine learning strategies
Source of experimental data: https://doi.org/10.3390/su16051972
Mix ID	Water-binder ratio	Cement (kg/m3)	Marble powder (kg/m3)	Glass powder (kg/m3)	Water (kg/m3)	Slump flow (mm)	Density (kg/m3)	Curing time (d)	CS (MPa)
Mix 1	0.4	400	0	0	160	680	2366	7	34.79
Mix 2	0.4	320	0	80	160	690	2468	7	19.14
Mix 3	0.4	320	80	0	160	660	2490	7	34.39
Mix 4	0.4	240	80	80	160	710	2490	7	16.61
Mix 5	0.5	400	0	0	200	830	2381	7	23.06
Mix 6	0.5	320	0	80	200	765	2469	7	23.46
Mix 7	0.5	320	80	0	200	825	2542	7	23.9
Mix 8	0.5	240	80	80	200	795	2552	7	16.12
Mix 9	0.4	320	40	40	160	790	2551	7	33.01
Mix 10	0.5	320	40	40	200	830	2515	7	22.4
Mix 11	0.45	360	0	40	180	735	2438	7	21.83
Mix 12	0.45	280	80	40	180	780	2617	7	23.03
Mix 13	0.45	360	40	0	180	785	2632	7	26.92
Mix 14	0.45	280	40	80	180	750	2557	7	18.41
Mix 15	0.45	320	40	40	180	725	2576	7	28.97
Mix 16	0.45	320	40	40	180	723	2561	7	26.18
Mix 17	0.45	320	40	40	180	725	2554	7	30.77
Mix 1	0.4	400	0	0	160	680	2366	28	37.75
Mix 2	0.4	320	0	80	160	690	2468	28	29.81
Mix 3	0.4	320	80	0	160	660	2490	28	36.49
Mix 4	0.4	240	80	80	160	710	2490	28	22
Mix 5	0.5	400	0	0	200	830	2381	28	32.51
Mix 6	0.5	320	0	80	200	765	2469	28	30.27
Mix 7	0.5	320	80	0	200	825	2542	28	26.66
Mix 8	0.5	240	80	80	200	795	2552	28	19.29
Mix 9	0.4	320	40	40	160	790	2551	28	34.55
Mix 10	0.5	320	40	40	200	830	2515	28	30.31
Mix 11	0.45	360	0	40	180	735	2438	28	29.68
Mix 12	0.45	280	80	40	180	780	2617	28	30.67
Mix 13	0.45	360	40	0	180	785	2632	28	33.96
Mix 14	0.45	280	40	80	180	750	2557	28	24.02
Mix 15	0.45	320	40	40	180	725	2576	28	32.44
Mix 16	0.45	320	40	40	180	723	2561	28	32.32
Mix 17	0.45	320	40	40	180	725	2554	28	34.54
Mix 1	0.4	400	0	0	160	680	2366	90	56.56
Mix 2	0.4	320	0	80	160	690	2468	90	44.71
Mix 3	0.4	320	80	0	160	660	2490	90	47.88
Mix 4	0.4	240	80	80	160	710	2490	90	36.27
Mix 5	0.5	400	0	0	200	830	2381	90	40.72
Mix 6	0.5	320	0	80	200	765	2469	90	39.59
Mix 7	0.5	320	80	0	200	825	2542	90	32.64
Mix 8	0.5	240	80	80	200	795	2552	90	26.1
Mix 9	0.4	320	40	40	160	790	2551	90	46.81
Mix 10	0.5	320	40	40	200	830	2515	90	48.84
Mix 11	0.45	360	0	40	180	735	2438	90	33.87
Mix 12	0.45	280	80	40	180	780	2617	90	35.08
Mix 13	0.45	360	40	0	180	785	2632	90	36.45
Mix 14	0.45	280	40	80	180	750	2557	90	32.21
Mix 15	0.45	320	40	40	180	725	2576	90	37.48
Mix 16	0.45	320	40	40	180	723	2561	90	36.23
Mix 17	0.45	320	40	40	180	725	2554	90	37.82

## Sheet: Expanded dataset used for model
Water-binder ratio	Cement (kg/m3)	Marble powder (kg/m3)	Glass powder (kg/m3)	Water (kg/m3)	Slump flow (mm)	Density (kg/m3)	Curing time (d)	CS (MPa)
0.4	400	0	0	160	680	2366	7	34.79
0.4	320	0	80	160	690	2468	7	19.14
0.4	320	80	0	160	660	2490	7	34.39
0.4	240	80	80	160	710	2490	7	16.61
0.5	400	0	0	200	830	2381	7	23.06
0.5	320	0	80	200	765	2469	7	23.46
0.5	320	80	0	200	825	2542	7	23.9
0.5	240	80	80	200	795	2552	7	16.12
0.4	320	40	40	160	790	2551	7	33.01
0.5	320	40	40	200	830	2515	7	22.4
0.45	360	0	40	180	735	2438	7	21.83
0.45	280	80	40	180	780	2617	7	23.03
0.45	360	40	0	180	785	2632	7	26.92
0.45	280	40	80	180	750	2557	7	18.41
0.45	320	40	40	180	725	2576	7	28.97
0.45	320	40	40	180	723	2561	7	26.18
0.45	320	40	40	180	725	2554	7	30.77
0.4	400	0	0	160	680	2366	28	37.75
0.4	320	0	80	160	690	2468	28	29.81
0.4	320	80	0	160	660	2490	28	36.49
0.4	240	80	80	160	710	2490	28	22
0.5	400	0	0	200	830	2381	28	32.51
0.5	320	0	80	200	765	2469	28	30.27
0.5	320	80	0	200	825	2542	28	26.66
0.5	240	80	80	200	795	2552	28	19.29
0.4	320	40	40	160	790	2551	28	34.55
0.5	320	40	40	200	830	2515	28	30.31
0.45	360	0	40	180	735	2438	28	29.68
0.45	280	80	40	180	780	2617	28	30.67
0.45	360	40	0	180	785	2632	28	33.96
0.45	280	40	80	180	750	2557	28	24.02
0.45	320	40	40	180	725	2576	28	32.44
0.45	320	40	40	180	723	2561	28	32.32
0.45	320	40	40	180	725	2554	28	34.54
0.4	400	0	0	160	680	2366	90	56.56
0.4	320	0	80	160	690	2468	90	44.71
0.4	320	80	0	160	660	2490	90	47.88
0.4	240	80	80	160	710	2490	90	36.27
0.5	400	0	0	200	830	2381	90	40.72
0.5	320	0	80	200	765	2469	90	39.59
0.5	320	80	0	200	825	2542	90	32.64
0.5	240	80	80	200	795	2552	90	26.1
0.4	320	40	40	160	790	2551	90	46.81
0.5	320	40	40	200	830	2515	90	48.84
0.45	360	0	40	180	735	2438	90	33.87
0.45	280	80	40	180	780	2617	90	35.08
0.45	360	40	0	180	785	2632	90	36.45
0.45	280	40	80	180	750	2557	90	32.21
0.45	320	40	40	180	725	2576	90	37.48
0.45	320	40	40	180	723	2561	90	36.23
0.45	320	40	40	180	725	2554	90	37.82
0.4	240	80	80	160	710	2490	90	36.27
0.4	240	80	80	160	710	2490	28	22
0.5	400	0	0	200	830	2381	90	40.72
0.5	320	0	80	200	765	2469	28	30.27
0.45	320	40	40	180	723	2561	7	26.18
0.4	400	0	0	160	680	2366	28	37.75
0.4	320	0	80	160	690	2468	7	19.14
0.45	360	0	40	180	735	2438	28	29.68
0.45	320	40	40	180	725	2576	28	32.44
0.45	320	40	40	180	723	2561	7	26.18
0.5	320	80	0	200	825	2542	7	23.9
0.45	360	40	0	180	785	2632	7	26.92
0.45	280	80	40	180	780	2617	28	30.67
0.45	320	40	40	180	725	2576	28	32.44
0.4	240	80	80	160	710	2490	90	36.27
0.4	240	80	80	160	710	2490	90	36.27
0.45	280	80	40	180	780	2617	90	35.08
0.45	280	40	80	180	750	2557	28	24.02
0.45	320	40	40	180	723	2561	7	26.18
0.45	320	40	40	180	723	2561	90	36.23
0.4	320	40	40	160	790	2551	90	46.81
0.5	320	80	0	200	825	2542	90	32.64
0.5	400	0	0	200	830	2381	90	40.72
0.4	400	0	0	160	680	2366	7	34.79
0.45	280	40	80	180	750	2557	7	18.41
0.45	320	40	40	180	725	2554	28	34.54
0.4	320	0	80	160	690	2468	7	19.14
0.45	280	80	40	180	780	2617	7	23.03
0.45	360	40	0	180	785	2632	28	33.96
0.5	320	80	0	200	825	2542	28	26.66
0.4	240	80	80	160	710	2490	90	36.27
0.4	320	40	40	160	790	2551	7	33.01
0.4	320	0	80	160	690	2468	7	19.14
0.4	320	40	40	160	790	2551	90	46.81
0.5	320	80	0	200	825	2542	7	23.9
0.45	280	40	80	180	750	2557	28	24.02
0.45	320	40	40	180	723	2561	7	26.18
0.5	320	80	0	200	825	2542	90	32.64
0.5	240	80	80	200	795	2552	90	26.1
0.45	320	40	40	180	723	2561	7	26.18
0.5	320	40	40	200	830	2515	7	22.4
0.45	320	40	40	180	725	2554	90	37.82
0.4	320	80	0	160	660	2490	90	47.88
0.4	320	40	40	160	790	2551	7	33.01
0.45	360	0	40	180	735	2438	90	33.87
0.4	240	80	80	160	710	2490	7	16.61
0.45	320	40	40	180	725	2554	7	30.77
0.45	320	40	40	180	725	2554	28	34.54
0.4	400	0	0	160	680	2366	7	34.79
0.5	320	40	40	200	830	2515	7	22.4
0.45	280	40	80	180	750	2557	7	18.41
0.5	240	80	80	200	795	2552	28	19.29
0.5	400	0	0	200	830	2381	28	32.51
0.5	240	80	80	200	795	2552	7	16.12
0.4	240	80	80	160	710	2490	90	36.27
0.5	320	80	0	200	825	2542	7	23.9
0.45	360	0	40	180	735	2438	28	29.68
0.4	400	0	0	160	680	2366	7	34.79
0.5	240	80	80	200	795	2552	7	16.12
0.5	400	0	0	200	830	2381	90	40.72
0.4	320	40	40	160	790	2551	90	46.81
0.4	240	80	80	160	710	2490	7	16.61
0.4	240	80	80	160	710	2490	28	22
0.5	320	40	40	200	830	2515	90	48.84
0.45	360	40	0	180	785	2632	7	26.92
0.4	400	0	0	160	680	2366	28	37.75
0.5	320	40	40	200	830	2515	28	30.31
0.4	320	0	80	160	690	2468	28	29.81
0.5	320	40	40	200	830	2515	7	22.4
0.45	280	80	40	180	780	2617	28	30.67
0.5	240	80	80	200	795	2552	90	26.1
0.5	240	80	80	200	795	2552	7	16.12
0.5	400	0	0	200	830	2381	90	40.72
0.45	320	40	40	180	725	2576	90	37.48
0.45	320	40	40	180	725	2576	28	32.44
0.4	320	0	80	160	690	2468	28	29.81
0.5	320	40	40	200	830	2515	7	22.4
0.5	240	80	80	200	795	2552	90	26.1
0.5	400	0	0	200	830	2381	28	32.51
0.5	320	0	80	200	765	2469	90	39.59
0.5	320	0	80	200	765	2469	90	39.59
0.45	320	40	40	180	725	2554	7	30.77
0.45	360	0	40	180	735	2438	7	21.83
0.45	360	0	40	180	735	2438	28	29.68
0.45	320	40	40	180	725	2554	28	34.54
0.45	280	80	40	180	780	2617	90	35.08
0.45	320	40	40	180	723	2561	7	26.18
0.4	400	0	0	160	680	2366	90	56.56
0.5	320	40	40	200	830	2515	7	22.4
0.4	400	0	0	160	680	2366	7	34.79
0.5	240	80	80	200	795	2552	28	19.29
0.4	400	0	0	160	680	2366	28	37.75
0.5	320	40	40	200	830	2515	90	48.84
0.4	320	80	0	160	660	2490	90	47.88
0.4	240	80	80	160	710	2490	7	16.61
0.45	320	40	40	180	725	2576	90	37.48
0.5	320	0	80	200	765	2469	28	30.27
0.5	400	0	0	200	830	2381	28	32.51
0.45	320	40	40	180	723	2561	90	36.23
0.45	280	40	80	180	750	2557	7	18.41
0.5	240	80	80	200	795	2552	28	19.29
0.5	320	80	0	200	825	2542	28	26.66
0.45	320	40	40	180	725	2554	28	34.54
0.5	320	0	80	200	765	2469	28	30.27
0.4	240	80	80	160	710	2490	28	22
0.5	320	40	40	200	830	2515	90	48.84
0.45	360	0	40	180	735	2438	7	21.83
0.4	320	0	80	160	690	2468	7	19.14
0.4	240	80	80	160	710	2490	7	16.61
0.5	320	40	40	200	830	2515	7	22.4
0.45	320	40	40	180	725	2554	28	34.54
0.45	280	80	40	180	780	2617	28	30.67
0.5	320	40	40	200	830	2515	90	48.84
0.45	320	40	40	180	725	2576	28	32.44
0.5	400	0	0	200	830	2381	90	40.72
0.5	320	0	80	200	765	2469	90	39.59
0.4	320	40	40	160	790	2551	7	33.01
0.5	400	0	0	200	830	2381	90	40.72
0.5	240	80	80	200	795	2552	28	19.29
0.5	240	80	80	200	795	2552	28	19.29
0.5	400	0	0	200	830	2381	90	40.72
0.45	360	0	40	180	735	2438	7	21.83
0.5	320	40	40	200	830	2515	90	48.84
0.45	320	40	40	180	725	2554	90	37.82
0.4	240	80	80	160	710	2490	90	36.27
0.4	320	0	80	160	690	2468	90	44.71
0.5	240	80	80	200	795	2552	28	19.29
0.5	320	80	0	200	825	2542	90	32.64
0.45	360	0	40	180	735	2438	90	33.87
0.5	320	40	40	200	830	2515	7	22.4
0.5	320	40	40	200	830	2515	28	30.31
0.45	320	40	40	180	725	2554	7	30.77
0.45	320	40	40	180	725	2554	28	34.54
0.45	280	40	80	180	750	2557	7	18.41
0.45	360	40	0	180	785	2632	90	36.45
0.5	320	40	40	200	830	2515	90	48.84
0.45	320	40	40	180	725	2554	28	34.54
0.4	320	0	80	160	690	2468	90	44.71
0.45	320	40	40	180	723	2561	90	36.23
0.5	320	40	40	200	830	2515	90	48.84
0.45	280	40	80	180	750	2557	90	32.21
0.4	400	0	0	160	680	2366	7	34.79
0.45	360	40	0	180	785	2632	7	26.92
0.45	320	40	40	180	725	2576	7	28.97
0.5	320	40	40	200	830	2515	90	48.84
0.4	320	40	40	160	790	2551	7	33.01
0.5	400	0	0	200	830	2381	28	32.51
0.5	320	0	80	200	765	2469	28	30.27
0.4	400	0	0	160	680	2366	90	56.56
0.45	320	40	40	180	723	2561	7	26.18
0.5	320	40	40	200	830	2515	28	30.31
0.45	320	40	40	180	725	2576	7	28.97
0.5	400	0	0	200	830	2381	7	23.06
0.4	240	80	80	160	710	2490	28	22
0.45	320	40	40	180	723	2561	7	26.18
0.5	320	80	0	200	825	2542	28	26.66
0.45	280	80	40	180	780	2617	7	23.03
0.45	320	40	40	180	725	2554	28	34.54
0.5	400	0	0	200	830	2381	28	32.51
0.5	320	40	40	200	830	2515	90	48.84
0.45	280	80	40	180	780	2617	7	23.03
0.45	280	40	80	180	750	2557	90	32.21
0.5	400	0	0	200	830	2381	7	23.06
0.45	320	40	40	180	725	2554	90	37.82
0.45	360	0	40	180	735	2438	7	21.83
0.45	320	40	40	180	725	2576	90	37.48
0.5	240	80	80	200	795	2552	7	16.12
0.4	320	80	0	160	660	2490	28	36.49
0.45	320	40	40	180	725	2554	28	34.54
0.5	400	0	0	200	830	2381	7	23.06
0.45	280	40	80	180	750	2557	90	32.21
0.4	320	80	0	160	660	2490	28	36.49
0.4	400	0	0	160	680	2366	28	37.75
0.4	240	80	80	160	710	2490	28	22
0.4	320	0	80	160	690	2468	28	29.81
0.45	320	40	40	180	723	2561	7	26.18
0.5	240	80	80	200	795	2552	7	16.12
0.5	400	0	0	200	830	2381	28	32.51
0.5	320	40	40	200	830	2515	7	22.4
0.45	360	0	40	180	735	2438	90	33.87
0.45	360	40	0	180	785	2632	90	36.45
0.45	320	40	40	180	723	2561	90	36.23
0.4	400	0	0	160	680	2366	90	56.56
0.45	280	40	80	180	750	2557	7	18.41
0.45	280	80	40	180	780	2617	7	23.03
0.5	320	80	0	200	825	2542	7	23.9
0.4	400	0	0	160	680	2366	90	56.56
0.5	320	0	80	200	765	2469	7	23.46
0.4	320	80	0	160	660	2490	28	36.49
0.4	400	0	0	160	680	2366	7	34.79
0.5	240	80	80	200	795	2552	90	26.1
0.5	240	80	80	200	795	2552	90	26.1
0.45	360	0	40	180	735	2438	7	21.83
0.4	320	80	0	160	660	2490	28	36.49
0.45	320	40	40	180	725	2576	90	37.48
0.4	320	80	0	160	660	2490	90	47.88
0.4	320	40	40	160	790	2551	7	33.01
0.45	320	40	40	180	723	2561	7	26.18
0.4	240	80	80	160	710	2490	28	22
0.5	400	0	0	200	830	2381	28	32.51
0.45	360	0	40	180	735	2438	28	29.68
0.4	400	0	0	160	680	2366	28	37.75
0.5	240	80	80	200	795	2552	28	19.29
0.5	320	80	0	200	825	2542	90	32.64
0.45	320	40	40	180	723	2561	7	26.18
0.5	320	0	80	200	765	2469	90	39.59
0.45	360	0	40	180	735	2438	90	33.87
0.45	320	40	40	180	725	2554	90	37.82
0.45	360	0	40	180	735	2438	90	33.87
0.5	400	0	0	200	830	2381	28	32.51
0.5	400	0	0	200	830	2381	7	23.06
0.4	240	80	80	160	710	2490	90	36.27
0.45	320	40	40	180	723	2561	90	36.23
0.45	320	40	40	180	725	2576	90	37.48
0.45	320	40	40	180	725	2576	28	32.44
0.45	320	40	40	180	723	2561	90	36.23
0.4	400	0	0	160	680	2366	28	37.75
0.5	320	0	80	200	765	2469	90	39.59
0.5	320	0	80	200	765	2469	7	23.46
0.4	400	0	0	160	680	2366	28	37.75
0.45	280	80	40	180	780	2617	7	23.03
0.45	360	0	40	180	735	2438	28	29.68
0.5	320	0	80	200	765	2469	28	30.27
0.4	240	80	80	160	710	2490	7	16.61
0.45	360	40	0	180	785	2632	7	26.92
0.45	360	0	40	180	735	2438	28	29.68
0.45	280	40	80	180	750	2557	90	32.21
0.45	360	0	40	180	735	2438	90	33.87
0.45	280	80	40	180	780	2617	90	35.08
0.45	280	40	80	180	750	2557	90	32.21
0.4	240	80	80	160	710	2490	7	16.61
0.4	400	0	0	160	680	2366	90	56.56
0.4	240	80	80	160	710	2490	28	22
0.4	320	0	80	160	690	2468	28	29.81
0.4	320	0	80	160	690	2468	7	19.14
0.5	320	0	80	200	765	2469	28	30.27
0.45	320	40	40	180	725	2576	7	28.97
0.5	320	0	80	200	765	2469	28	30.27
0.45	320	40	40	180	725	2576	28	32.44
0.45	280	80	40	180	780	2617	7	23.03
0.5	320	40	40	200	830	2515	28	30.31
0.4	320	0	80	160	690	2468	28	29.81
0.5	320	80	0	200	825	2542	28	26.66
0.45	320	40	40	180	723	2561	28	32.32
0.45	320	40	40	180	723	2561	28	32.32
0.45	360	0	40	180	735	2438	28	29.68
0.5	400	0	0	200	830	2381	28	32.51
0.5	320	80	0	200	825	2542	7	23.9
0.45	280	40	80	180	750	2557	28	24.02
0.45	280	80	40	180	780	2617	28	30.67
0.5	320	0	80	200	765	2469	90	39.59
0.45	360	0	40	180	735	2438	7	21.83
0.4	240	80	80	160	710	2490	7	16.61
0.45	280	40	80	180	750	2557	7	18.41
0.45	320	40	40	180	725	2576	90	37.48
0.45	320	40	40	180	725	2554	28	34.54
0.5	320	80	0	200	825	2542	7	23.9
0.5	320	0	80	200	765	2469	90	39.59
0.5	400	0	0	200	830	2381	7	23.06
0.45	360	0	40	180	735	2438	28	29.68
0.4	400	0	0	160	680	2366	28	37.75
0.4	240	80	80	160	710	2490	28	22
0.5	320	0	80	200	765	2469	7	23.46
0.45	360	0	40	180	735	2438	90	33.87
0.5	320	80	0	200	825	2542	28	26.66
0.5	240	80	80	200	795	2552	7	16.12
0.45	320	40	40	180	725	2576	7	28.97
0.5	400	0	0	200	830	2381	90	40.72
0.4	320	0	80	160	690	2468	28	29.81
0.4	400	0	0	160	680	2366	90	56.56
0.4	320	80	0	160	660	2490	7	34.39
0.45	280	40	80	180	750	2557	28	24.02
0.45	320	40	40	180	723	2561	90	36.23
0.45	320	40	40	180	725	2576	28	32.44
0.4	320	0	80	160	690	2468	7	19.14
0.5	320	40	40	200	830	2515	7	22.4
0.4	240	80	80	160	710	2490	90	36.27
0.45	320	40	40	180	725	2554	90	37.82
0.5	320	80	0	200	825	2542	28	26.66
0.45	320	40	40	180	725	2554	7	30.77
0.45	320	40	40	180	725	2576	28	32.44
0.5	240	80	80	200	795	2552	90	26.1
0.45	320	40	40	180	723	2561	90	36.23
0.4	400	0	0	160	680	2366	7	34.79
0.4	320	80	0	160	660	2490	28	36.49
0.5	320	40	40	200	830	2515	28	30.31
0.4	320	80	0	160	660	2490	28	36.49
0.4	320	40	40	160	790	2551	7	33.01
0.5	240	80	80	200	795	2552	7	16.12
0.5	400	0	0	200	830	2381	28	32.51
0.5	400	0	0	200	830	2381	90	40.72
0.5	400	0	0	200	830	2381	28	32.51
0.4	320	0	80	160	690	2468	28	29.81
0.5	400	0	0	200	830	2381	28	32.51
0.5	400	0	0	200	830	2381	90	40.72
0.5	320	0	80	200	765	2469	28	30.27
0.45	320	40	40	180	725	2576	28	32.44
0.5	320	80	0	200	825	2542	28	26.66
0.4	320	40	40	160	790	2551	7	33.01
0.4	320	0	80	160	690	2468	7	19.14
0.4	320	40	40	160	790	2551	28	34.55
0.45	320	40	40	180	725	2554	28	34.54
0.4	400	0	0	160	680	2366	90	56.56
0.45	360	0	40	180	735	2438	7	21.83
0.45	320	40	40	180	725	2576	7	28.97
0.45	280	40	80	180	750	2557	90	32.21
0.45	320	40	40	180	725	2554	28	34.54
0.45	320	40	40	180	725	2554	28	34.54
0.5	240	80	80	200	795	2552	90	26.1
0.5	320	0	80	200	765	2469	28	30.27
0.4	320	80	0	160	660	2490	7	34.39
0.45	320	40	40	180	725	2554	28	34.54
0.45	280	80	40	180	780	2617	28	30.67
0.4	400	0	0	160	680	2366	28	37.75
0.5	320	80	0	200	825	2542	7	23.9
0.4	320	80	0	160	660	2490	90	47.88
0.45	280	80	40	180	780	2617	7	23.03
0.45	360	0	40	180	735	2438	28	29.68
0.4	400	0	0	160	680	2366	7	34.79
0.4	400	0	0	160	680	2366	90	56.56
0.5	320	0	80	200	765	2469	28	30.27
0.45	320	40	40	180	723	2561	28	32.32
0.5	320	0	80	200	765	2469	90	39.59
0.45	360	0	40	180	735	2438	7	21.83
0.4	400	0	0	160	680	2366	28	37.75
0.45	320	40	40	180	725	2576	28	32.44
0.5	240	80	80	200	795	2552	90	26.1
0.4	240	80	80	160	710	2490	28	22
0.45	360	0	40	180	735	2438	7	21.83
0.45	280	80	40	180	780	2617	28	30.67
0.5	320	0	80	200	765	2469	7	23.46
0.5	240	80	80	200	795	2552	7	16.12
0.5	320	0	80	200	765	2469	90	39.59
0.5	320	40	40	200	830	2515	90	48.84
0.45	360	0	40	180	735	2438	90	33.87
0.5	240	80	80	200	795	2552	90	26.1
0.4	240	80	80	160	710	2490	90	36.27
0.45	280	80	40	180	780	2617	28	30.67
0.45	360	40	0	180	785	2632	28	33.96
0.45	360	40	0	180	785	2632	28	33.96
0.45	360	40	0	180	785	2632	7	26.92
0.45	360	40	0	180	785	2632	28	33.96
0.5	320	0	80	200	765	2469	90	39.59
0.4	320	40	40	160	790	2551	90	46.81
0.45	280	80	40	180	780	2617	90	35.08
0.5	320	0	80	200	765	2469	7	23.46
0.4	320	0	80	160	690	2468	28	29.81
0.4	320	40	40	160	790	2551	90	46.81
0.4	320	0	80	160	690	2468	28	29.81
0.45	320	40	40	180	725	2576	90	37.48
0.5	400	0	0	200	830	2381	90	40.72
0.4	320	40	40	160	790	2551	28	34.55
0.45	320	40	40	180	725	2554	90	37.82
0.45	320	40	40	180	725	2554	7	30.77
0.5	400	0	0	200	830	2381	28	32.51
0.45	320	40	40	180	725	2576	28	32.44
0.45	280	80	40	180	780	2617	28	30.67
0.45	320	40	40	180	725	2554	7	30.77
0.45	320	40	40	180	725	2576	28	32.44
0.45	320	40	40	180	723	2561	28	32.32
0.5	400	0	0	200	830	2381	7	23.06
0.45	280	80	40	180	780	2617	7	23.03
0.45	320	40	40	180	725	2554	28	34.54
0.45	320	40	40	180	723	2561	90	36.23
0.5	400	0	0	200	830	2381	7	23.06
0.45	320	40	40	180	723	2561	7	26.18
0.45	360	40	0	180	785	2632	7	26.92
0.45	320	40	40	180	725	2576	90	37.48
0.5	320	80	0	200	825	2542	28	26.66
0.4	320	80	0	160	660	2490	28	36.49
0.5	320	80	0	200	825	2542	7	23.9
0.45	360	0	40	180	735	2438	90	33.87
0.5	320	40	40	200	830	2515	28	30.31
0.45	320	40	40	180	725	2554	7	30.77
0.4	320	80	0	160	660	2490	28	36.49
0.5	320	80	0	200	825	2542	28	26.66
0.45	280	40	80	180	750	2557	90	32.21
0.4	320	80	0	160	660	2490	90	47.88
0.4	320	40	40	160	790	2551	90	46.81
0.45	360	0	40	180	735	2438	7	21.83
0.45	280	80	40	180	780	2617	90	35.08
0.5	320	80	0	200	825	2542	7	23.9
0.4	320	80	0	160	660	2490	7	34.39
0.4	400	0	0	160	680	2366	90	56.56
0.4	320	0	80	160	690	2468	90	44.71
0.45	360	40	0	180	785	2632	90	36.45
0.4	320	40	40	160	790	2551	7	33.01
0.5	320	0	80	200	765	2469	28	30.27
0.45	360	0	40	180	735	2438	90	33.87
0.45	280	80	40	180	780	2617	28	30.67
0.45	360	40	0	180	785	2632	7	26.92
0.4	400	0	0	160	680	2366	7	34.79
0.5	240	80	80	200	795	2552	90	26.1
0.45	320	40	40	180	725	2576	90	37.48
0.45	320	40	40	180	725	2576	28	32.44
0.4	400	0	0	160	680	2366	7	34.79
0.45	320	40	40	180	725	2554	90	37.82
0.4	240	80	80	160	710	2490	90	36.27
0.5	240	80	80	200	795	2552	28	19.29
0.4	320	40	40	160	790	2551	90	46.81
0.4	400	0	0	160	680	2366	7	34.79
0.5	240	80	80	200	795	2552	7	16.12
0.45	280	80	40	180	780	2617	90	35.08
0.4	400	0	0	160	680	2366	7	34.79
0.45	280	40	80	180	750	2557	28	24.02
0.45	360	0	40	180	735	2438	90	33.87
0.4	320	80	0	160	660	2490	90	47.88
0.5	320	80	0	200	825	2542	7	23.9
0.45	280	40	80	180	750	2557	7	18.41
0.45	360	0	40	180	735	2438	28	29.68
0.45	360	40	0	180	785	2632	90	36.45
0.5	320	0	80	200	765	2469	90	39.59
0.45	320	40	40	180	725	2576	7	28.97
0.4	400	0	0	160	680	2366	7	34.79
0.4	400	0	0	160	680	2366	28	37.75
0.45	360	0	40	180	735	2438	7	21.83
0.45	320	40	40	180	725	2576	90	37.48
0.45	360	40	0	180	785	2632	90	36.45
0.5	320	40	40	200	830	2515	7	22.4
0.4	240	80	80	160	710	2490	7	16.61
0.4	320	0	80	160	690	2468	90	44.71
0.5	240	80	80	200	795	2552	7	16.12
0.4	320	40	40	160	790	2551	7	33.01
0.45	360	40	0	180	785	2632	28	33.96
0.45	360	0	40	180	735	2438	28	29.68
0.45	320	40	40	180	725	2554	7	30.77
0.45	360	40	0	180	785	2632	90	36.45
0.4	240	80	80	160	710	2490	7	16.61
0.5	320	80	0	200	825	2542	90	32.64
0.45	280	40	80	180	750	2557	90	32.21
0.4	240	80	80	160	710	2490	90	36.27
0.45	320	40	40	180	725	2554	90	37.82
0.45	280	80	40	180	780	2617	90	35.08
0.5	240	80	80	200	795	2552	28	19.29
0.5	320	40	40	200	830	2515	28	30.31
0.5	320	0	80	200	765	2469	28	30.27
0.4	320	0	80	160	690	2468	28	29.81
0.5	320	40	40	200	830	2515	90	48.84
0.4	240	80	80	160	710	2490	28	22
0.5	320	0	80	200	765	2469	28	30.27
0.45	280	40	80	180	750	2557	90	32.21
0.4	240	80	80	160	710	2490	90	36.27
0.4	240	80	80	160	710	2490	28	22
0.45	320	40	40	180	723	2561	7	26.18
0.4	320	40	40	160	790	2551	28	34.55
0.45	320	40	40	180	725	2576	28	32.44
0.45	280	40	80	180	750	2557	90	32.21
0.45	320	40	40	180	725	2576	90	37.48
0.45	280	40	80	180	750	2557	28	24.02
0.5	240	80	80	200	795	2552	7	16.12
0.5	320	0	80	200	765	2469	90	39.59
0.5	400	0	0	200	830	2381	90	40.72
0.45	280	40	80	180	750	2557	28	24.02
0.5	320	80	0	200	825	2542	28	26.66
0.45	280	40	80	180	750	2557	7	18.41
0.4	320	40	40	160	790	2551	28	34.55
0.4	320	40	40	160	790	2551	7	33.01
0.45	360	40	0	180	785	2632	28	33.96
0.4	320	40	40	160	790	2551	28	34.55
